# Supplementary material for: Tetanus Neurotoxin Neutralizing Antibodies Screened from a Human Immune scFv Antibody Phage Display Library
Source: PubMed Central journal article supplement (PMC5037492; doi:10.3390/toxins8090266), 2016-09-11
Supplement: toxins-08-00266-s001.pdf [file toxins-08-00266-s001.pdf]

# Supplementary Materials: Tetanus Neurotoxin Neutralizing Antibodies Screened from a Human Immune scFv Antibody Phage Display Library

Han Wang, Rui Yu, Ting Fang, Ting Yu, Xiangyang Chi, Xiaopeng Zhang, Shuling Liu, Ling Fu, Changming Yu and Wei Chen

## 1. Families of the Heavy Chain and Light Chain the CDR-Sequences of the scFvs Isolated from the Phage-Displayed Library

**Table S1.** Families of the heavy Chain and the CDR-Sequences of the scFvs isolated from the Phage-Displayed Library.

| Heavy Chain Family | Clone  | VH      |                    |                        |
|--------------------|--------|---------|--------------------|------------------------|
|                    |        | CDR1    | CDR2               | CDR3                   |
| VH2                | 2-1B   | TSGVGVG | LIYWNDDKRYSPSLKS   | ARDTSGKYSYRTATYGYSM DY |
| VH3                | 2-2D   | DYGMS   | GINWNGGSTGYADSVKG  | ENHDSSGYFSRLSFDV       |
| VH3                | 2-7E   | DYGMS   | GINWNGGSTGYADSVKG  | ENHDSSGYFSRLSFDV       |
| VH3                | 2-7G   | SNYMS   | LISWDGGSTYYADSVKG  | RRGANYYYGMDV           |
| VH3                | 3-6C   | SYGMH   | VISYDGSNKYYADSVKG  | ATFCDYTDYLGRCEALES     |
| VH5                | 5-1A   | SYWIS   | RIDPSDSYTNYSFQ     | VKRGDNGWGAFDV          |
| VH1                | 5-5E   | SSAVQ   | WIVVGSNTNYAQKFQE   | ARVPETTVTGPLLYYYYGMDV  |
| VH2                | S-1-1H | SSYGMH  | RIDWDDDKFYSTSLKT   | AEAGAAAWATGANALDA      |
| VH2                | S-3-2D | SSYGMH  | RIDWDDDKFYSTSLKT   | AEAGAAAWATGANALDA      |
| VH6                | S-1-7C | SNSAAWN | RTYRSKQWYNDYAVSVKS | LGGGRYSYGYIPYYYYMDV    |
| VH5                | S-4-6C | SSYGMH  | RIDWDDDKFYSTSLKT   | AEAGAAAWATGANALDA      |
| VH6                | S-4-7H | SNSAAWN | RTYRSKQWYNDYAVSVKS | LGGGRYSYGYIPYYYYMDV    |

**Table S2.** Families of the light Chain and the CDR-Sequences of the scFvs isolated from the Phage-Displayed Library.

| Light Chain Family | Clone  | VL           |         |             |
|--------------------|--------|--------------|---------|-------------|
|                    |        | CDR1         | CDR2    | CDR3        |
| VK1                | 2-1B   | RASQSISSWLA  | DASSLES | QQYNSYS     |
| VK3                | 2-2D   | RASQSVSSSYLA | GASSRAT | QQRTSWPPA   |
| VK3                | 2-7E   | RASQSVSSSYLA | GASSRAT | QQRTSWPPA   |
| VK3                | 2-7G   | RASQSVSSNLA  | GASTRAT | HQYGLPRT    |
| VK1                | 3-6C   | WASQGISSYLA  | YASSLQS | QQYYSTP     |
| VK1                | 5-1A   | RASQGISSWLA  | AASSLQS | QQANSFP     |
| VK3                | 5-5E   | RASQSVSSSYLA | DASNRAT | QQRSNWP     |
| VK3                | S-1-1H | RASQSVSSSYLA | GASSRAT | QQYGSSP     |
| VK3                | S-3-2D | RASQSVSSSYLA | GASSRAT | QQYGSSP     |
| VA1                | S-1-7C | SGSSNIGNNAVN | YDDLPS  | ATWGDALNGPV |
| VK1                | S-4-6C | RASQSVSSSYLA | GASSRAT | QQYGSSP     |
| VA1                | S-4-7H | SGSSNIGNNAVN | YDDLPS  | ATWGDALNGPV |

## 2. SDS-PAGE of the scFv Expressed and Isolated from *E. coli*

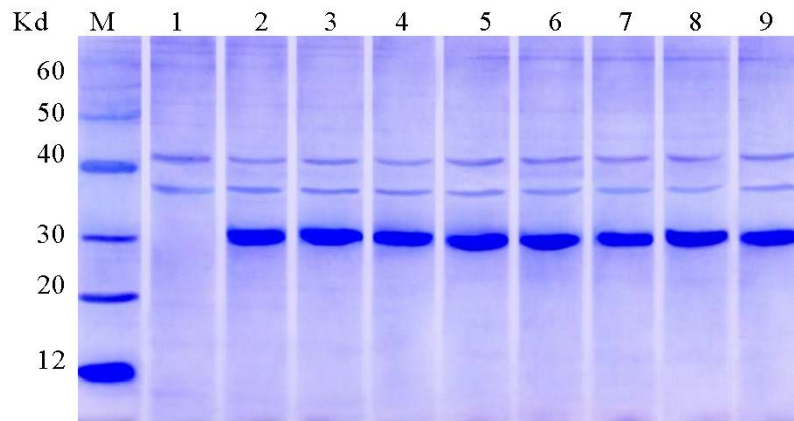

**Figure S1.** SDS-PAGE analysis of recombinant Kil-SN-scFv in *E. coli* BL21. M: Marker; Lane 1: supernatant of Kil-SN induced with IPTG; Lane 2–9: supernatant of Kil-SN-scFv induced with IPTG, from left to right: 2-1B, 2-2D, 2-7G, 3-6C, 5-1A, 5-5E, S-1-1H, S-4-7H.

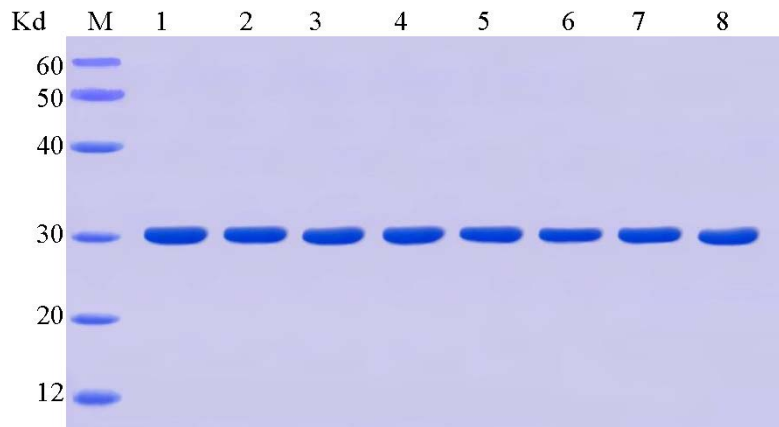

**Figure S2.** SDS-PAGE analyses of the His-scFv protein purified using Ni-NTA agarose column. M: Marker; Lane 1–8: purified His-scFv, from left to right: 2-1B, 2-2D, 2-7G, 3-6C, 5-1A, 5-5E, S-1-1H, S-4-7H.

## 3. ELISA Characterization of Purified scFvs Binding to Different Proteins

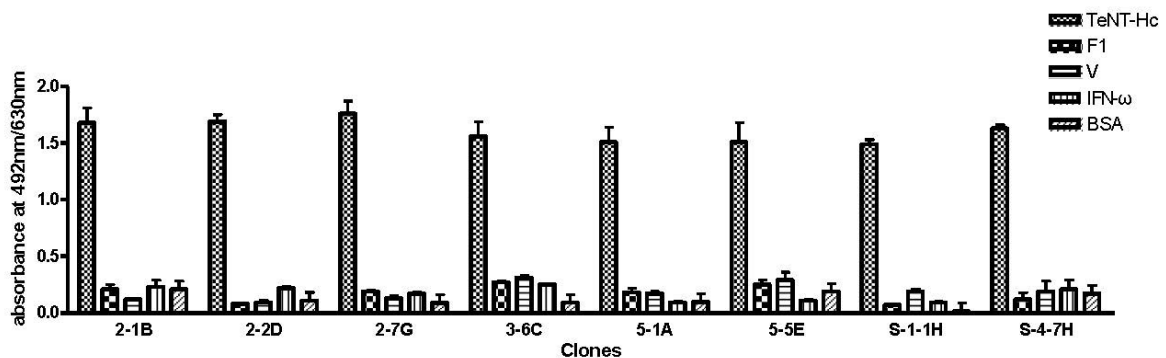

**Figure S3.** ELISA characterization of purified scFvs binding to different proteins. Assays were performed by immobilizing TeNT-Hc, F1, V, IFN- $\omega$ , and BSA-coated on a polystyrene plate. Purified scFvs that were reactive with the coated antigen, were detected with a 1:5000 dilution of horseradish peroxidase (HRP)-conjugated anti-His antibody. The results of the assay are shown as the absorbance at 492 nm/630 nm. Assays were performed in triplicate, and the range is shown.
